# Supplementary material
Source: MDPI journal article supplement (https://www.mdpi.com/1424-2818/13/12/668)
Supplement: s1 [file s1]

**Table S2.** Sequencing data generated for *T. loennbergii* genome assembly.

| Library type | Number of cells | Number of reads | Total read bases (bp) |
|--------------|-----------------|-----------------|-----------------------|
| PacBio       | 4               | 6,258,640       | 77,938,427,833        |
| Hi-C         |                 | 208,008,742     | 31,409,320,042        |
| Iso-seq      | 2               | 1,211,859       | 63,927,996,589        |

**Table S3.** Lengths of *T. loennbergii* genome scaffolds (over 9 Mb).

| No. | Scaffold name  | Length (bp) |
|-----|----------------|-------------|
| 1   | trescfv1_00002 | 48,466,630  |
| 2   | trescfv1_00399 | 37,384,537  |
| 3   | trescfv1_00006 | 33,625,553  |
| 4   | trescfv1_00001 | 32,911,037  |
| 5   | trescfv1_00023 | 31,988,177  |
| 6   | trescfv1_00060 | 31,753,086  |
| 7   | trescfv1_00127 | 31,057,693  |
| 8   | trescfv1_00016 | 29,132,375  |
| 9   | trescfv1_00056 | 28,046,923  |
| 10  | trescfv1_00033 | 26,889,712  |
| 11  | trescfv1_00103 | 26,707,442  |
| 12  | trescfv1_00116 | 26,366,161  |
| 13  | trescfv1_00086 | 25,980,741  |
| 14  | trescfv1_00027 | 25,710,439  |
| 15  | trescfv1_00014 | 25,647,304  |
| 16  | trescfv1_00026 | 24,660,741  |
| 17  | trescfv1_00066 | 24,182,687  |
| 18  | trescfv1_00028 | 23,546,061  |
| 19  | trescfv1_00012 | 23,285,647  |
| 20  | trescfv1_00037 | 18,648,639  |
| 21  | trescfv1_00017 | 16,915,034  |
| 22  | trescfv1_00135 | 15,527,446  |
| 23  | trescfv1_00055 | 9,913,305   |

**Table S4.** Statistics for annotated *T. loennbergii* transposable elements.

| Class                       | Number of elements | Length occupied (bp) | Percentage of sequence (%) |
|-----------------------------|--------------------|----------------------|----------------------------|
| SINEs:                      | 32,294             | 5,826,086            | 0.48                       |
| MIRs                        | 20,442             | 4,023,716            | 0.33                       |
| LINEs:                      | 209,794            | 77,377,903           | 6.39                       |
| LINE1                       | 7,383              | 5,114,973            | 0.42                       |
| LINE2                       | 117,091            | 39,115,964           | 3.23                       |
| LTR elements:               | 76,230             | 41,535,962           | 3.43                       |
| ERV_classI                  | 5,039              | 3,099,391            | 0.26                       |
| ERV_classII                 | 139                | 41,606               | 0                          |
| DNA elements:               | 573,944            | 173,022,812          | 14.29                      |
| hAT-Charlie                 | 54,620             | 16,633,540           | 1.37                       |
| Unclassified:               | 712,403            | 190,694,924          | 15.75                      |
| Total interspersed repeats: |                    | 488,457,687          | 40.35                      |
| Small RNA:                  | 1,435              | 1,428,525            | 0.12                       |
| Satellites:                 | 65,154             | 12,233,455           | 1.01                       |
| Simple repeats:             | 392,791            | 38,599,651           | 3.19                       |
| Low complexity:             | 34,868             | 2,207,534            | 0.18                       |
| GC level: (%)               |                    |                      | 41.12                      |
| Bases masked:               |                    | 540,631,316          | 44.66                      |

**Table S5.** Species information used in this study.

| Common name                 | Species                            | Assembly                 |
|-----------------------------|------------------------------------|--------------------------|
| Antarctic scaly rockcod     | <i>Trematomus loennbergii</i>      | This study               |
| Antarctic icefish           | <i>Chaenocephalus aceratus</i>     | Kim et al., 2019*        |
| Antarctic dragonfish        | <i>Parachaenichthys charcoti</i>   | Ahn et al., 2017**       |
| Antarctic bullhead notothen | <i>Notothenia coriiceps</i>        | GCA_000735185            |
| Stickleback                 | <i>Gasterosteus aculeatus</i>      | BROAD S1                 |
| Spiny chromis               | <i>Acanthochromis polyacanthus</i> | ASM210954v1              |
| Midas cichlid               | <i>Amphilophus citrinellus</i>     | Midas_v5                 |
| Orange clownfish            | <i>Amphiprion percula</i>          | Nemo_v1                  |
| Climbing perch              | <i>Anabas testudineus</i>          | fAnaTes1.1               |
| Pachon cavefish             | <i>Astyanax mexicanus</i>          | Astyanax_mexicanus-1.0.2 |
| Atlantic herring            | <i>Clupea harengus</i>             | Ch_v2.0.2                |
| Zebrafish                   | <i>Danio rerio</i>                 | GRCz11                   |
| Cod                         | <i>Gadus morhua</i>                | gadMor1                  |
| Coelacanth                  | <i>Latimeria chalumnae</i>         | LatCha1                  |
| Nile tilapia                | <i>Oreochromis niloticus</i>       | O_niloticus_UMD_NMBU     |
| Japanese medaka HNI         | <i>Oryzias latipes</i>             | ASM223471v1              |
| Amazon molly                | <i>Poecilia formosa</i>            | Poecilia_formosa-5.1.2   |
| Yellowtail amberjack        | <i>Seriola lalandi dorsalis</i>    | Sedor1                   |
| Fugu                        | <i>Takifugu rubripes</i>           | fTakRub1.2               |
| Platyfish                   | <i>Xiphophorus maculatus</i>       | X_maculatus-5.0-male     |

\* Kim et al., 2019, Nature Ecology & Evolution, 3, 469–478.; \*\* Ahn et al., 2017, GigaScience, 6, gix060.

**Table S6.** Summary of gene families of *Trematomus loennbergii* and other fish species.

|                           | Number of genes | Number of genes in orthogroups | Number of unassigned genes | Percentage of genes in orthogroups | Percentage of unassigned genes | Number of orthogroups containing species | Percentage of orthogroups containing species | Number of species-specific orthogroups | Number of genes in species-specific orthogroups | Percentage of genes in species-specific orthogroups |
|---------------------------|-----------------|--------------------------------|----------------------------|------------------------------------|--------------------------------|------------------------------------------|----------------------------------------------|----------------------------------------|-------------------------------------------------|-----------------------------------------------------|
| <i>T. loennbergii</i>     | 29,900          | 28,556                         | 1,344                      | 95.5                               | 4.5                            | 15,668                                   | 62.9                                         | 229                                    | 895                                             | 3.0                                                 |
| <i>N. coriiceps</i>       | 32,661          | 29,240                         | 3,421                      | 89.5                               | 10.5                           | 18,396                                   | 73.8                                         | 114                                    | 269                                             | 0.8                                                 |
| <i>P. charcoti</i>        | 32,713          | 31,571                         | 1,142                      | 96.5                               | 3.5                            | 18,617                                   | 74.7                                         | 79                                     | 421                                             | 1.3                                                 |
| <i>C. aceratus</i>        | 30,773          | 28,505                         | 2,268                      | 92.6                               | 7.4                            | 17,057                                   | 68.5                                         | 229                                    | 847                                             | 2.8                                                 |
| <i>A. polyacanthus</i>    | 24,027          | 23,626                         | 401                        | 98.3                               | 1.7                            | 15,771                                   | 63.3                                         | 66                                     | 155                                             | 0.6                                                 |
| <i>A. citrinellus</i>     | 23,696          | 23,349                         | 347                        | 98.5                               | 1.5                            | 15,305                                   | 61.4                                         | 18                                     | 46                                              | 0.2                                                 |
| <i>A. percula</i>         | 23,926          | 23,379                         | 547                        | 97.7                               | 2.3                            | 15,458                                   | 62.1                                         | 20                                     | 93                                              | 0.4                                                 |
| <i>A. testudineus</i>     | 24,643          | 24,270                         | 373                        | 98.5                               | 1.5                            | 15,378                                   | 61.7                                         | 41                                     | 136                                             | 0.6                                                 |
| <i>A. mexicanus</i>       | 26,698          | 25,403                         | 1,295                      | 95.1                               | 4.9                            | 15,543                                   | 62.4                                         | 135                                    | 632                                             | 2.4                                                 |
| <i>C. harengus</i>        | 24,095          | 23,349                         | 746                        | 96.9                               | 3.1                            | 14,430                                   | 57.9                                         | 110                                    | 493                                             | 2.0                                                 |
| <i>D. rerio</i>           | 30,313          | 29,443                         | 870                        | 97.1                               | 2.9                            | 15,205                                   | 61.0                                         | 207                                    | 1,782                                           | 5.9                                                 |
| <i>G. morhua</i>          | 20,095          | 19,503                         | 592                        | 97.1                               | 2.9                            | 13,904                                   | 55.8                                         | 17                                     | 70                                              | 0.3                                                 |
| <i>G. aculeatus</i>       | 20,787          | 20,225                         | 562                        | 97.3                               | 2.7                            | 14,149                                   | 56.8                                         | 16                                     | 47                                              | 0.2                                                 |
| <i>L. chalumnae</i>       | 19,569          | 18,923                         | 646                        | 96.7                               | 3.3                            | 13,305                                   | 53.4                                         | 124                                    | 986                                             | 5.0                                                 |
| <i>O. niloticus</i>       | 28,189          | 27,440                         | 749                        | 97.3                               | 2.7                            | 15,334                                   | 61.6                                         | 100                                    | 616                                             | 2.2                                                 |
| <i>O. latipes</i>         | 22,127          | 21,515                         | 612                        | 97.2                               | 2.8                            | 14,522                                   | 58.3                                         | 34                                     | 229                                             | 1.0                                                 |
| <i>P. formosa</i>         | 23,615          | 23,433                         | 182                        | 99.2                               | 0.8                            | 15,164                                   | 60.9                                         | 25                                     | 87                                              | 0.4                                                 |
| <i>S. lalandidorsalis</i> | 24,755          | 24,224                         | 531                        | 97.9                               | 2.1                            | 15,793                                   | 63.4                                         | 61                                     | 131                                             | 0.5                                                 |
| <i>T. rubripes</i>        | 21,411          | 20,804                         | 607                        | 97.2                               | 2.8                            | 14,120                                   | 56.7                                         | 50                                     | 201                                             | 0.9                                                 |
| <i>X. maculatus</i>       | 23,774          | 23,291                         | 483                        | 98.0                               | 2.0                            | 15,288                                   | 61.4                                         | 36                                     | 140                                             | 0.6                                                 |

**Table S7.** Gene Ontology of expanded genes families in the *T. loennbergii* genome among twenty fishes.

| Category* | GO ID      | GO Name                                                                 | No. genes | P-Value  |
|-----------|------------|-------------------------------------------------------------------------|-----------|----------|
| B         | GO:0050907 | detection of chemical stimulus involved in sensory perception           | 32        | 5.00E-13 |
| B         | GO:0020027 | hemoglobin metabolic process                                            | 16        | 5.60E-13 |
| B         | GO:0009593 | detection of chemical stimulus                                          | 32        | 8.10E-12 |
| B         | GO:0010605 | negative regulation of macromolecule metabolic process                  | 103       | 1.10E-11 |
| B         | GO:0032269 | negative regulation of cellular protein metabolic process               | 61        | 2.70E-11 |
| B         | GO:0051248 | negative regulation of protein metabolic process                        | 61        | 2.70E-11 |
| B         | GO:0043086 | negative regulation of catalytic activity                               | 59        | 6.80E-11 |
| B         | GO:0051172 | negative regulation of nitrogen compound metabolic process              | 91        | 9.80E-11 |
| B         | GO:0050906 | detection of stimulus involved in sensory perception                    | 32        | 1.20E-10 |
| B         | GO:0031324 | negative regulation of cellular metabolic process                       | 91        | 2.50E-10 |
| B         | GO:0044092 | negative regulation of molecular function                               | 60        | 7.00E-10 |
| B         | GO:0051336 | regulation of hydrolase activity                                        | 84        | 6.00E-09 |
| B         | GO:0006956 | complement activation                                                   | 19        | 2.60E-08 |
| B         | GO:0032268 | regulation of cellular protein metabolic process                        | 97        | 3.20E-08 |
| B         | GO:0051246 | regulation of protein metabolic process                                 | 99        | 4.00E-08 |
| B         | GO:0098868 | bone growth                                                             | 7         | 4.10E-08 |
| B         | GO:0003413 | chondrocyte differentiation involved in endochondral bone morphogenesis | 7         | 4.10E-08 |
| B         | GO:0003422 | growth plate cartilage morphogenesis                                    | 7         | 4.10E-08 |
| B         | GO:0003417 | growth plate cartilage development                                      | 7         | 4.10E-08 |
| B         | GO:0003418 | growth plate cartilage chondrocyte differentiation                      | 7         | 4.10E-08 |
| B         | GO:0003429 | growth plate cartilage chondrocyte morphogenesis                        | 7         | 4.10E-08 |
| B         | GO:0003416 | endochondral bone growth                                                | 7         | 4.10E-08 |
| B         | GO:0003433 | chondrocyte development involved in endochondral bone morphogenesis     | 7         | 4.10E-08 |
| B         | GO:0098660 | inorganic ion transmembrane transport                                   | 89        | 7.50E-08 |
| B         | GO:0000041 | transition metal ion transport                                          | 17        | 1.60E-07 |
| B         | GO:1902476 | chloride transmembrane transport                                        | 19        | 2.00E-07 |
| B         | GO:0006821 | chloride transport                                                      | 22        | 6.20E-07 |
| B         | GO:0050790 | regulation of catalytic activity                                        | 106       | 6.60E-07 |
| B         | GO:0060255 | regulation of macromolecule metabolic process                           | 261       | 9.80E-07 |
| B         | GO:0006959 | humoral immune response                                                 | 19        | 1.20E-06 |
| B         | GO:0090171 | chondrocyte morphogenesis                                               | 7         | 1.30E-06 |
| B         | GO:0034453 | microtubule anchoring                                                   | 9         | 2.00E-06 |
| B         | GO:1902600 | proton transmembrane transport                                          | 29        | 2.90E-06 |
| B         | GO:0061737 | leukotriene signaling pathway                                           | 6         | 3.00E-06 |
| B         | GO:0002191 | cap-dependent translational initiation                                  | 6         | 3.00E-06 |

|   |            |                                                                                           |     |          |
|---|------------|-------------------------------------------------------------------------------------------|-----|----------|
| B | GO:0098655 | cation transmembrane transport                                                            | 83  | 3.90E-06 |
| B | GO:0006508 | proteolysis                                                                               | 137 | 3.90E-06 |
| B | GO:0098661 | inorganic anion transmembrane transport                                                   | 19  | 4.10E-06 |
| B | GO:0009617 | response to bacterium                                                                     | 23  | 4.20E-06 |
| B | GO:0098662 | inorganic cation transmembrane transport                                                  | 76  | 5.60E-06 |
| B | GO:0030001 | metal ion transport                                                                       | 77  | 5.70E-06 |
| B | GO:0051171 | regulation of nitrogen compound metabolic process                                         | 244 | 6.30E-06 |
| B | GO:0080090 | regulation of primary metabolic process                                                   | 247 | 6.80E-06 |
| B | GO:0015672 | monovalent inorganic cation transport                                                     | 62  | 9.80E-06 |
| C | GO:0060077 | inhibitory synapse                                                                        | 7   | 4.10E-08 |
| C | GO:0005858 | axonemal dynein complex                                                                   | 11  | 6.80E-07 |
| C | GO:0015630 | microtubule cytoskeleton                                                                  | 56  | 2.20E-06 |
| M | GO:0061135 | endopeptidase regulator activity                                                          | 55  | 2.20E-18 |
| M | GO:0030414 | peptidase inhibitor activity                                                              | 54  | 1.10E-16 |
| M | GO:0061134 | peptidase regulator activity                                                              | 56  | 1.80E-16 |
| M | GO:0016813 | hydrolase activity, acting on carbon-nitrogen (but not peptide) bonds, in linear amidines | 18  | 2.10E-15 |
| M | GO:0004857 | enzyme inhibitor activity                                                                 | 56  | 3.40E-13 |
| M | GO:0031404 | chloride ion binding                                                                      | 12  | 2.60E-12 |
| M | GO:0005247 | voltage-gated chloride channel activity                                                   | 17  | 3.90E-12 |
| M | GO:0004067 | asparaginase activity                                                                     | 12  | 1.60E-11 |
| M | GO:0008308 | voltage-gated anion channel activity                                                      | 17  | 8.80E-11 |
| M | GO:0016810 | hydrolase activity, acting on carbon-nitrogen (but not peptide) bonds                     | 38  | 1.00E-10 |
| M | GO:0005254 | chloride channel activity                                                                 | 21  | 2.20E-10 |
| M | GO:0005253 | anion channel activity                                                                    | 21  | 1.90E-09 |
| M | GO:0003777 | microtubule motor activity                                                                | 37  | 5.20E-09 |
| M | GO:0015108 | chloride transmembrane transporter activity                                               | 22  | 2.20E-08 |
| M | GO:0015299 | solute:proton antiporter activity                                                         | 15  | 8.50E-08 |
| M | GO:0015078 | proton transmembrane transporter activity                                                 | 32  | 1.80E-07 |
| M | GO:0043178 | alcohol binding                                                                           | 11  | 1.90E-07 |
| M | GO:0004132 | dCMP deaminase activity                                                                   | 6   | 4.60E-07 |
| M | GO:0019842 | vitamin binding                                                                           | 27  | 6.20E-07 |
| M | GO:0098808 | mRNA cap binding                                                                          | 6   | 3.00E-06 |
| M | GO:0004974 | leukotriene receptor activity                                                             | 6   | 3.00E-06 |
| M | GO:0070679 | inositol 1,4,5 trisphosphate binding                                                      | 7   | 3.90E-06 |
| M | GO:0004692 | cGMP-dependent protein kinase activity                                                    | 8   | 6.60E-06 |
| M | GO:0005540 | hyaluronic acid binding                                                                   | 14  | 8.10E-06 |

\*B, Biological process; C, Cellular component; M, Molecular function

**Table S8.** Gene Ontology of contracted genes families in the *T. loennbergii* genome among twenty fishes.

| Category | GO ID      | GO Name                                                   | No. genes | P-Value  |
|----------|------------|-----------------------------------------------------------|-----------|----------|
| B        | GO:0006796 | phosphate-containing compound metabolic process           | 52        | 1.10E-10 |
| B        | GO:0006793 | phosphorus metabolic process                              | 52        | 1.40E-10 |
| B        | GO:0048731 | system development                                        | 49        | 2.00E-09 |
| B        | GO:0036211 | protein modification process                              | 48        | 2.30E-08 |
| B        | GO:0006464 | cellular protein modification process                     | 48        | 2.30E-08 |
| B        | GO:0070887 | cellular response to chemical stimulus                    | 23        | 6.50E-08 |
| B        | GO:0043412 | macromolecule modification                                | 48        | 1.10E-07 |
| B        | GO:1901564 | organonitrogen compound metabolic process                 | 70        | 1.50E-07 |
| B        | GO:0044260 | cellular macromolecule metabolic process                  | 80        | 1.60E-07 |
| B        | GO:0044267 | cellular protein metabolic process                        | 55        | 3.30E-07 |
| B        | GO:0016043 | cellular component organization                           | 43        | 4.10E-07 |
| B        | GO:0048368 | lateral mesoderm development                              | 5         | 6.30E-07 |
| B        | GO:0006996 | organelle organization                                    | 32        | 1.10E-06 |
| B        | GO:0006468 | protein phosphorylation                                   | 26        | 1.20E-06 |
| B        | GO:0016310 | phosphorylation                                           | 34        | 1.40E-06 |
| B        | GO:1990778 | protein localization to cell periphery                    | 6         | 2.10E-06 |
| B        | GO:0080090 | regulation of primary metabolic process                   | 42        | 2.30E-06 |
| B        | GO:0009889 | regulation of biosynthetic process                        | 34        | 3.70E-06 |
| B        | GO:0031323 | regulation of cellular metabolic process                  | 42        | 3.80E-06 |
| B        | GO:2000112 | regulation of cellular macromolecule biosynthetic process | 33        | 3.90E-06 |
| B        | GO:0019538 | protein metabolic process                                 | 59        | 4.30E-06 |
| B        | GO:0048513 | animal organ development                                  | 33        | 5.10E-06 |
| B        | GO:0072659 | protein localization to plasma membrane                   | 5         | 6.00E-06 |

|   |            |                                                        |    |          |
|---|------------|--------------------------------------------------------|----|----------|
| B | GO:0006355 | regulation of transcription, DNA-templated             | 31 | 6.30E-06 |
| B | GO:0043170 | macromolecule metabolic process                        | 86 | 6.70E-06 |
| B | GO:0035295 | tube development                                       | 16 | 7.10E-06 |
| B | GO:0010556 | regulation of macromolecule biosynthetic process       | 33 | 7.10E-06 |
| B | GO:0071310 | cellular response to organic substance                 | 17 | 7.30E-06 |
| B | GO:0007399 | nervous system development                             | 23 | 7.40E-06 |
| B | GO:0035690 | cellular response to drug                              | 6  | 8.60E-06 |
| B | GO:0031326 | regulation of cellular biosynthetic process            | 33 | 9.00E-06 |
| B | GO:0051171 | regulation of nitrogen compound metabolic process      | 40 | 9.10E-06 |
| C | GO:0043227 | membrane-bounded organelle                             | 65 | 1.50E-06 |
| C | GO:0009898 | cytoplasmic side of plasma membrane                    | 5  | 4.10E-06 |
| C | GO:0098562 | cytoplasmic side of membrane                           | 5  | 7.10E-06 |
| C | GO:0031332 | RNAi effector complex                                  | 3  | 7.30E-06 |
| C | GO:0016442 | RISC complex                                           | 3  | 7.30E-06 |
| M | GO:0004715 | non-membrane spanning protein tyrosine kinase activity | 7  | 2.70E-09 |
| M | GO:0019003 | GDP binding                                            | 6  | 8.20E-08 |
| M | GO:0004672 | protein kinase activity                                | 23 | 2.90E-06 |
| M | GO:0016773 | phosphotransferase activity, alcohol group as acceptor | 24 | 4.70E-06 |
| M | GO:0000287 | magnesium ion binding                                  | 8  | 5.50E-06 |
| M | GO:0035198 | miRNA binding                                          | 3  | 7.30E-06 |
| M | GO:0004674 | protein serine/threonine kinase activity               | 14 | 7.60E-06 |

**Table S9.** Gene Ontology of specific genes families in the *T. loennbergii* genome among four Antarctic fishes.

| Category | GO ID      | GO Name                                                                                                                                                                                     | No. genes | P-Value  |
|----------|------------|---------------------------------------------------------------------------------------------------------------------------------------------------------------------------------------------|-----------|----------|
| B        | GO:0001890 | placenta development                                                                                                                                                                        | 6         | 7.50E-05 |
| B        | GO:0022904 | respiratory electron transport chain                                                                                                                                                        | 12        | 4.80E-05 |
| B        | GO:0019646 | aerobic electron transport chain                                                                                                                                                            | 12        | 3.30E-07 |
| B        | GO:0006119 | oxidative phosphorylation                                                                                                                                                                   | 12        | 1.40E-04 |
| B        | GO:0042773 | ATP synthesis coupled electron transport                                                                                                                                                    | 12        | 2.10E-05 |
| B        | GO:0021517 | ventral spinal cord development                                                                                                                                                             | 13        | 1.20E-04 |
| B        | GO:0006123 | mitochondrial electron transport, cytochrome c to oxygen                                                                                                                                    | 12        | 3.30E-07 |
| B        | GO:0021515 | cell differentiation in spinal cord                                                                                                                                                         | 13        | 2.00E-04 |
| B        | GO:0021522 | spinal cord motor neuron differentiation                                                                                                                                                    | 13        | 5.90E-06 |
| B        | GO:0038007 | netrin-activated signaling pathway                                                                                                                                                          | 6         | 2.50E-05 |
| B        | GO:0006259 | DNA metabolic process                                                                                                                                                                       | 64        | 3.60E-06 |
| B        | GO:0042775 | mitochondrial ATP synthesis coupled electron transport                                                                                                                                      | 12        | 1.10E-05 |
| B        | GO:0015074 | DNA integration                                                                                                                                                                             | 48        | 3.70E-19 |
| B        | GO:0006310 | DNA recombination                                                                                                                                                                           | 22        | 6.50E-07 |
| B        | GO:0001701 | in utero embryonic development                                                                                                                                                              | 9         | 1.30E-05 |
| M        | GO:0009055 | electron transfer activity                                                                                                                                                                  | 15        | 8.70E-05 |
| M        | GO:0016675 | oxidoreductase activity, acting on a heme group of donors                                                                                                                                   | 15        | 3.30E-08 |
| M        | GO:0030246 | carbohydrate binding                                                                                                                                                                        | 38        | 2.90E-06 |
| M        | GO:0015002 | heme-copper terminal oxidase activity                                                                                                                                                       | 15        | 3.30E-08 |
| M        | GO:0016712 | oxidoreductase activity, acting on paired donors, with incorporation or reduction of molecular oxygen, reduced flavin or flavoprotein as one donor, and incorporation of one atom of oxygen | 10        | 8.80E-05 |
| M        | GO:0016676 | oxidoreductase activity, acting on a heme group of donors, oxygen as acceptor                                                                                                               | 15        | 3.30E-08 |
| M        | GO:0016886 | ligase activity, forming phosphoric ester bonds                                                                                                                                             | 6         | 1.80E-04 |
| M        | GO:0008452 | RNA ligase activity                                                                                                                                                                         | 6         | 2.50E-05 |
| M        | GO:0004129 | cytochrome-c oxidase activity                                                                                                                                                               | 15        | 3.30E-08 |
| M        | GO:0005042 | netrin receptor activity                                                                                                                                                                    | 6         | 4.50E-05 |
| M        | GO:0017166 | vinculin binding                                                                                                                                                                            | 6         | 4.50E-05 |
| M        | GO:0003972 | RNA ligase (ATP) activity                                                                                                                                                                   | 6         | 2.50E-05 |
| M        | GO:0008234 | cysteine-type peptidase activity                                                                                                                                                            | 29        | 2.40E-04 |
| M        | GO:0015078 | proton transmembrane transporter activity                                                                                                                                                   | 19        | 2.90E-04 |
| M        | GO:0005506 | iron ion binding                                                                                                                                                                            | 26        | 9.50E-06 |
| C        | GO:0005746 | mitochondrial respirasome                                                                                                                                                                   | 12        | 5.80E-05 |
| C        | GO:0098803 | respiratory chain complex                                                                                                                                                                   | 12        | 3.20E-05 |
| C        | GO:0072669 | tRNA-splicing ligase complex                                                                                                                                                                | 6         | 1.20E-04 |
| C        | GO:0045277 | respiratory chain complex IV                                                                                                                                                                | 12        | 9.00E-07 |
| C        | GO:0005751 | mitochondrial respiratory chain complex IV                                                                                                                                                  | 12        | 6.50E-07 |
| C        | GO:0070069 | cytochrome complex                                                                                                                                                                          | 12        | 1.70E-06 |
